# Supplementary material for: Potential Antiviral Strategy Exploiting Dependence of SARS-CoV-2 Replication on Lysosome-Based Pathway
Source: MDPI journal article supplement (doi:10.3390/ijms23116188), 2022-05-31
Supplement: s1 [file s1]

**Table S1.** The antiviral effect of the biomaterials within the manuscript.

| Biomaterials                                           | Modulating lysosomal function | Anti-SARS-CoV-2 effect | Reference |
|--------------------------------------------------------|-------------------------------|------------------------|-----------|
| Amantadine                                             | Inhibiting CTSL activity      | ++                     | [74-76]   |
| Teicoplanin                                            | Inhibiting CTSL activity      | +                      | [77]      |
| Astaxanthin                                            | Inhibiting CTSL activity      | ++                     | [78, 79]  |
| MOL736                                                 | Inhibiting CTSL activity      | +                      | [81]      |
| Water and ethanol extracts of <i>Drynariae Rhizoma</i> | Inhibiting CTSL activity      | —                      | [73, 82]  |
| Choloroquine                                           | Rasing the lysosomal PH       | ++                     | [84, 85]  |
| Hydroxychloroquine                                     | Rasing the lysosomal PH       | ++                     | [84, 85]  |
| ROC-325                                                | Rasing the lysosomal PH       | +                      | [89]      |
| Nitazoxanide                                           | Rasing the lysosomal PH       | ++                     | [90]      |
| IITZ-01                                                | Rasing the lysosomal PH       | —                      | [57]      |
| IITZ-02                                                | Rasing the lysosomal PH       | —                      | [57]      |
| Obatoclax mesylate                                     | Rasing the lysosomal PH       | +                      | [91]      |
| Bafilomycin A1                                         | Rasing the lysosomal PH       | ++                     | [95]      |
| NH <sub>4</sub> Cl                                     | Rasing the lysosomal PH       | ++                     | [95]      |
| PLGA                                                   | Lowering the lysosomal PH     | —                      | [96]      |

++ Suppressing viral infection *in vitro* and *in vivo*; + Suppressing viral infection *in vitro*; — Unknown.
